# Supplementary material for: Distinct Luminal-Type Mammary Carcinomas Arise from Orthotopic Trp53 -Null Mammary Transplantation of Juvenile versus Adult Mice
Source: Oxford University Press journal article supplement (doi:10.1158/0008-5472.can-14-1440), 2014-10-03
Supplement: 00085472can141440-sup-131681_1_supp_2647501_nbghvh.xlsx [file 00085472can141440-sup-131681_1_supp_2647501_nbghvh.xlsx]

## Sheet: Sheet1
ID	Gene ID	Change of gene expression
ILMN_1220508	1110018J23Rik	UP	100% (13/13) SAMs
ILMN_2849016	1300013J15Rik	UP	100% (13/13) SAMs
ILMN_1249000	1500015O10Rik	UP	100% (13/13) SAMs
ILMN_1258349	1700019N12Rik	UP	100% (13/13) SAMs
ILMN_2678637	2200001I15Rik	UP	100% (13/13) SAMs
ILMN_1228334	2410015N17Rik	UP	100% (13/13) SAMs
ILMN_2598181	3110079O15Rik	UP	100% (13/13) SAMs
ILMN_1233535	6330407J23Rik	UP	100% (13/13) SAMs
ILMN_2738825	Acta1	UP	100% (13/13) SAMs
ILMN_2588055	Actb	UP	100% (13/13) SAMs
ILMN_2455596	Adamts18	UP	100% (13/13) SAMs
ILMN_2538422	Adap1	UP	100% (13/13) SAMs
ILMN_2944765	Agps	UP	100% (13/13) SAMs
ILMN_2972521	Agtr1a	UP	100% (13/13) SAMs
ILMN_2645341	Ano1	UP	100% (13/13) SAMs
ILMN_1238547	Areg	UP	100% (13/13) SAMs
ILMN_1227845	BC018465	UP	100% (13/13) SAMs
ILMN_2472093	BC020108	UP	100% (13/13) SAMs
ILMN_1232107	Bex2	UP	100% (13/13) SAMs
ILMN_2744927	Calca	UP	100% (13/13) SAMs
ILMN_2695143	Capn6	UP	100% (13/13) SAMs
ILMN_1214255	Cd200	UP	100% (13/13) SAMs
ILMN_2699665	Cd209f	UP	100% (13/13) SAMs
ILMN_2543393	Cdca8	UP	100% (13/13) SAMs
ILMN_2975345	Cdo1	UP	100% (13/13) SAMs
ILMN_1213474	Cited1	UP	100% (13/13) SAMs
ILMN_2980323	Cldn2	UP	100% (13/13) SAMs
ILMN_2941790	Cldn6	UP	100% (13/13) SAMs
ILMN_2747811	Crlf1	UP	100% (13/13) SAMs
ILMN_2854811	Csn3	UP	100% (13/13) SAMs
ILMN_2621622	Csnk	UP	100% (13/13) SAMs
ILMN_2658908	Cxcl12	UP	100% (13/13) SAMs
ILMN_2635462	Cxcl15	UP	100% (13/13) SAMs
ILMN_1227535	Cyp3a57	UP	100% (13/13) SAMs
ILMN_2829129	Dcpp1	UP	100% (13/13) SAMs
ILMN_2695819	Ddit4l	UP	100% (13/13) SAMs
ILMN_1243528	Dmrta2	UP	100% (13/13) SAMs
ILMN_2744879	Dnaic1	UP	100% (13/13) SAMs
ILMN_2782964	Enpp1	UP	100% (13/13) SAMs
ILMN_2773215	Epb4.1l4b	UP	100% (13/13) SAMs
ILMN_1228497	Esrrb	UP	100% (13/13) SAMs
ILMN_1239717	Expi	UP	100% (13/13) SAMs
ILMN_1225071	Fgfr2	UP	100% (13/13) SAMs
ILMN_1237195	Foxa1	UP	100% (13/13) SAMs
ILMN_2609998	Fxyd6	UP	100% (13/13) SAMs
ILMN_1257299	G0s2	UP	100% (13/13) SAMs
ILMN_1251237	Gabrp	UP	100% (13/13) SAMs
ILMN_2798138	Gipc2	UP	100% (13/13) SAMs
ILMN_2597778	Gna14	UP	100% (13/13) SAMs
ILMN_1244316	Hbb-b1	UP	100% (13/13) SAMs
ILMN_2762944	Ifi27	UP	100% (13/13) SAMs
ILMN_2597769	Igf2	UP	100% (13/13) SAMs
ILMN_1259747	Il33	UP	100% (13/13) SAMs
ILMN_2673879	Itih2	UP	100% (13/13) SAMs
ILMN_2711267	Krt18	UP	100% (13/13) SAMs
ILMN_2614462	Krt19	UP	100% (13/13) SAMs
ILMN_2961152	Krt7	UP	100% (13/13) SAMs
ILMN_2712075	Lcn2	UP	100% (13/13) SAMs
ILMN_2657431	LOC100042514	UP	100% (13/13) SAMs
ILMN_2633688	LOC100046800	UP	100% (13/13) SAMs
ILMN_2759344	LOC100048733	UP	100% (13/13) SAMs
ILMN_2537948	LOC624610	UP	100% (13/13) SAMs
ILMN_2754364	Ltf	UP	100% (13/13) SAMs
ILMN_1255416	Ly6a	UP	100% (13/13) SAMs
ILMN_1254927	Ly6c1	UP	100% (13/13) SAMs
ILMN_2803920	Ly6d	UP	100% (13/13) SAMs
ILMN_3138904	Ntrk2	UP	100% (13/13) SAMs
ILMN_2637094	Pcsk6	UP	100% (13/13) SAMs
ILMN_2425029	Phlda2	UP	100% (13/13) SAMs
ILMN_1260448	Plk2	UP	100% (13/13) SAMs
ILMN_2604494	Podxl	UP	100% (13/13) SAMs
ILMN_2503728	Polr2l	UP	100% (13/13) SAMs
ILMN_2617005	Prlr	UP	100% (13/13) SAMs
ILMN_2638114	Ptn	UP	100% (13/13) SAMs
ILMN_1233146	Rasgrf1	UP	100% (13/13) SAMs
ILMN_2733708	Rbp7	UP	100% (13/13) SAMs
ILMN_1226472	Retnla	UP	100% (13/13) SAMs
ILMN_2488599	Rims3	UP	100% (13/13) SAMs
ILMN_2634317	Slc1a3	UP	100% (13/13) SAMs
ILMN_2698880	Slc35f3	UP	100% (13/13) SAMs
ILMN_1245214	Slc5a5	UP	100% (13/13) SAMs
ILMN_1219717	Sort1	UP	100% (13/13) SAMs
ILMN_1243507	Spsb4	UP	100% (13/13) SAMs
ILMN_2739544	Stc2	UP	100% (13/13) SAMs
ILMN_2751494	Stk39	UP	100% (13/13) SAMs
ILMN_2776283	Tcea3	UP	100% (13/13) SAMs
ILMN_2783225	Tcfap2c	UP	100% (13/13) SAMs
ILMN_2850937	Tmed3	UP	100% (13/13) SAMs
ILMN_2966162	Tmem56	UP	100% (13/13) SAMs
ILMN_1223880	Tmprss2	UP	100% (13/13) SAMs
ILMN_1216742	Trp63	UP	100% (13/13) SAMs
ILMN_2948296	Wfdc12	UP	100% (13/13) SAMs
ILMN_1236758	Wfdc2	UP	100% (13/13) SAMs
ILMN_2423835	Wnt6	UP	100% (13/13) SAMs
ILMN_2483786	1110004P21Rik	DOWN	100% (13/13) SAMs
ILMN_2745954	1110007L15Rik	DOWN	100% (13/13) SAMs
ILMN_2739128	1110039B18Rik	DOWN	100% (13/13) SAMs
ILMN_2606015	2500002L14Rik	DOWN	100% (13/13) SAMs
ILMN_2630827	4930504E06Rik	DOWN	100% (13/13) SAMs
ILMN_2760415	Abcf1	DOWN	100% (13/13) SAMs
ILMN_2669034	Abcf2	DOWN	100% (13/13) SAMs
ILMN_1242390	Actn4	DOWN	100% (13/13) SAMs
ILMN_2648397	Anapc5	DOWN	100% (13/13) SAMs
ILMN_2888834	Apob48r	DOWN	100% (13/13) SAMs
ILMN_2997406	Arl4c	DOWN	100% (13/13) SAMs
ILMN_2608429	Atp6v0d1	DOWN	100% (13/13) SAMs
ILMN_2629528	Atp9a	DOWN	100% (13/13) SAMs
ILMN_1252199	Aup1	DOWN	100% (13/13) SAMs
ILMN_2698430	Bcl2l1	DOWN	100% (13/13) SAMs
ILMN_2776431	C1qa	DOWN	100% (13/13) SAMs
ILMN_2863849	C1qtnf3	DOWN	100% (13/13) SAMs
ILMN_2861176	Calr	DOWN	100% (13/13) SAMs
ILMN_1218668	Calu	DOWN	100% (13/13) SAMs
ILMN_2629052	Cbx3	DOWN	100% (13/13) SAMs
ILMN_1227384	Ccnl	DOWN	100% (13/13) SAMs
ILMN_1247832	Cd74	DOWN	100% (13/13) SAMs
ILMN_2428301	Clk1	DOWN	100% (13/13) SAMs
ILMN_2768087	Col6a1	DOWN	100% (13/13) SAMs
ILMN_2733793	Coro1a	DOWN	100% (13/13) SAMs
ILMN_1228232	Cpe	DOWN	100% (13/13) SAMs
ILMN_1230485	Csf1r	DOWN	100% (13/13) SAMs
ILMN_1213617	Ctsa	DOWN	100% (13/13) SAMs
ILMN_2704119	Cul4a	DOWN	100% (13/13) SAMs
ILMN_2952779	Cxx1a	DOWN	100% (13/13) SAMs
ILMN_2636832	Cyb5r3	DOWN	100% (13/13) SAMs
ILMN_1225931	D11Moh35	DOWN	100% (13/13) SAMs
ILMN_1240406	D130059O18Rik	DOWN	100% (13/13) SAMs
ILMN_1242767	Dok1	DOWN	100% (13/13) SAMs
ILMN_1215208	Dvl1	DOWN	100% (13/13) SAMs
ILMN_1231355	E230029F23Rik	DOWN	100% (13/13) SAMs
ILMN_1239110	Eef2	DOWN	100% (13/13) SAMs
ILMN_2835683	EG667977	DOWN	100% (13/13) SAMs
ILMN_2671259	Eif3b	DOWN	100% (13/13) SAMs
ILMN_2615741	Eif3s8	DOWN	100% (13/13) SAMs
ILMN_2702215	Eif4a2	DOWN	100% (13/13) SAMs
ILMN_2753323	Eif4b	DOWN	100% (13/13) SAMs
ILMN_2716514	Eif4g1	DOWN	100% (13/13) SAMs
ILMN_2678828	Eif5a	DOWN	100% (13/13) SAMs
ILMN_1224780	Elovl1	DOWN	100% (13/13) SAMs
ILMN_3112185	Ensa	DOWN	100% (13/13) SAMs
ILMN_2599615	Ergic3	DOWN	100% (13/13) SAMs
ILMN_1222773	Exoc4	DOWN	100% (13/13) SAMs
ILMN_1260445	Fxr2	DOWN	100% (13/13) SAMs
ILMN_1254374	Fzr1	DOWN	100% (13/13) SAMs
ILMN_2719888	G3bp1	DOWN	100% (13/13) SAMs
ILMN_1225535	Ganab	DOWN	100% (13/13) SAMs
ILMN_2632299	Gdi1	DOWN	100% (13/13) SAMs
ILMN_1216015	Gmppa	DOWN	100% (13/13) SAMs
ILMN_2686393	Gna12	DOWN	100% (13/13) SAMs
ILMN_1223437	Gnas	DOWN	100% (13/13) SAMs
ILMN_1248139	Gp49a	DOWN	100% (13/13) SAMs
ILMN_2741114	Gusb	DOWN	100% (13/13) SAMs
ILMN_2742160	H13	DOWN	100% (13/13) SAMs
ILMN_2631423	H2-Ab1	DOWN	100% (13/13) SAMs
ILMN_2615855	Hnrnpa2b1	DOWN	100% (13/13) SAMs
ILMN_1218767	Hnrnph1	DOWN	100% (13/13) SAMs
ILMN_1245987	Hnrnpk	DOWN	100% (13/13) SAMs
ILMN_2918479	Hspa8	DOWN	100% (13/13) SAMs
ILMN_2639036	Hspd1	DOWN	100% (13/13) SAMs
ILMN_2727503	Igfbp3	DOWN	100% (13/13) SAMs
ILMN_2649068	Irf1	DOWN	100% (13/13) SAMs
ILMN_2747456	Ivns1abp	DOWN	100% (13/13) SAMs
ILMN_2607926	Kdelr2	DOWN	100% (13/13) SAMs
ILMN_3149251	Lgsn	DOWN	100% (13/13) SAMs
ILMN_2746887	Lhfp	DOWN	100% (13/13) SAMs
ILMN_1238838	LOC100045005	DOWN	100% (13/13) SAMs
ILMN_2655437	LOC100045963	DOWN	100% (13/13) SAMs
ILMN_1250969	LOC100047016	DOWN	100% (13/13) SAMs
ILMN_2705119	LOC100047353	DOWN	100% (13/13) SAMs
ILMN_2727536	LOC100048413	DOWN	100% (13/13) SAMs
ILMN_1245389	LOC236604	DOWN	100% (13/13) SAMs
ILMN_2525491	LOC331102	DOWN	100% (13/13) SAMs
ILMN_2540344	LOC381889	DOWN	100% (13/13) SAMs
ILMN_2541035	LOC381996	DOWN	100% (13/13) SAMs
ILMN_2536676	LOC383981	DOWN	100% (13/13) SAMs
ILMN_1224842	LOC385068	DOWN	100% (13/13) SAMs
ILMN_1246590	LOC545208	DOWN	100% (13/13) SAMs
ILMN_1212768	LOC545750	DOWN	100% (13/13) SAMs
ILMN_1259869	LOC622655	DOWN	100% (13/13) SAMs
ILMN_1242935	LOC633016	DOWN	100% (13/13) SAMs
ILMN_1247996	LOC673501	DOWN	100% (13/13) SAMs
ILMN_2602542	Lrmp	DOWN	100% (13/13) SAMs
ILMN_1252076	Lyz2	DOWN	100% (13/13) SAMs
ILMN_2763602	Maea	DOWN	100% (13/13) SAMs
ILMN_2764883	Mafg	DOWN	100% (13/13) SAMs
ILMN_2686183	Map1lc3a	DOWN	100% (13/13) SAMs
ILMN_2593368	Mat2a	DOWN	100% (13/13) SAMs
ILMN_1255287	Mela	DOWN	100% (13/13) SAMs
ILMN_2682173	Mfsd11	DOWN	100% (13/13) SAMs
ILMN_3075003	Mlf2	DOWN	100% (13/13) SAMs
ILMN_2737685	Mmp13	DOWN	100% (13/13) SAMs
ILMN_2704576	Mmp3	DOWN	100% (13/13) SAMs
ILMN_2694960	Msn	DOWN	100% (13/13) SAMs
ILMN_2708297	Mtch1	DOWN	100% (13/13) SAMs
ILMN_2620122	P2rx4	DOWN	100% (13/13) SAMs
ILMN_2705407	Pabpc1	DOWN	100% (13/13) SAMs
ILMN_1237695	Pfkp	DOWN	100% (13/13) SAMs
ILMN_2923607	Phlda3	DOWN	100% (13/13) SAMs
ILMN_2723860	Pkm2	DOWN	100% (13/13) SAMs
ILMN_3150724	Ppfibp1	DOWN	100% (13/13) SAMs
ILMN_1246058	Ppp1ca	DOWN	100% (13/13) SAMs
ILMN_2606243	Ppp2r1a	DOWN	100% (13/13) SAMs
ILMN_1220284	Psmd7	DOWN	100% (13/13) SAMs
ILMN_1243690	Ptbp1	DOWN	100% (13/13) SAMs
ILMN_3123303	Pxn	DOWN	100% (13/13) SAMs
ILMN_2693124	Rab1b	DOWN	100% (13/13) SAMs
ILMN_3029294	Rab34	DOWN	100% (13/13) SAMs
ILMN_2689119	Ralgds	DOWN	100% (13/13) SAMs
ILMN_1237007	Ranbp3	DOWN	100% (13/13) SAMs
ILMN_2618068	Rarg	DOWN	100% (13/13) SAMs
ILMN_2691192	Rbbp7	DOWN	100% (13/13) SAMs
ILMN_2450735	Rn18s	DOWN	100% (13/13) SAMs
ILMN_1238612	Rnf114	DOWN	100% (13/13) SAMs
ILMN_1259754	Rnf4	DOWN	100% (13/13) SAMs
ILMN_1255833	scl0001905.1_3	DOWN	100% (13/13) SAMs
ILMN_2772274	Sfrs5	DOWN	100% (13/13) SAMs
ILMN_2732859	Sidt2	DOWN	100% (13/13) SAMs
ILMN_1244123	Slc38a2	DOWN	100% (13/13) SAMs
ILMN_2670959	Snrp70	DOWN	100% (13/13) SAMs
ILMN_1247582	Snrpa	DOWN	100% (13/13) SAMs
ILMN_3059326	Sparc	DOWN	100% (13/13) SAMs
ILMN_2600348	Sqle	DOWN	100% (13/13) SAMs
ILMN_2630641	Srm	DOWN	100% (13/13) SAMs
ILMN_3096144	Stat3	DOWN	100% (13/13) SAMs
ILMN_2706232	Syngr2	DOWN	100% (13/13) SAMs
ILMN_2636463	Tcf4	DOWN	100% (13/13) SAMs
ILMN_2643879	Tcirg1	DOWN	100% (13/13) SAMs
ILMN_1248415	Tgoln1	DOWN	100% (13/13) SAMs
ILMN_2629993	Tmem214	DOWN	100% (13/13) SAMs
ILMN_2758878	Tmem66	DOWN	100% (13/13) SAMs
ILMN_2469329	Tnfrsf1a	DOWN	100% (13/13) SAMs
ILMN_2896200	Tnn	DOWN	100% (13/13) SAMs
ILMN_2444316	Tpm3	DOWN	100% (13/13) SAMs
ILMN_1225522	Trpc4ap	DOWN	100% (13/13) SAMs
ILMN_2638061	Tsc22d4	DOWN	100% (13/13) SAMs
ILMN_1232099	Tspan3	DOWN	100% (13/13) SAMs
ILMN_2727921	Tspo	DOWN	100% (13/13) SAMs
ILMN_2492377	Ube2v1	DOWN	100% (13/13) SAMs
ILMN_2460653	Unc93b1	DOWN	100% (13/13) SAMs
ILMN_2506144	Vapb	DOWN	100% (13/13) SAMs
ILMN_2508519	Vars	DOWN	100% (13/13) SAMs
ILMN_2454788	Wbp1	DOWN	100% (13/13) SAMs
ILMN_1246770	Ybx3	DOWN	100% (13/13) SAMs
