# Supplementary material for: Distinct Luminal-Type Mammary Carcinomas Arise from Orthotopic Trp53 -Null Mammary Transplantation of Juvenile versus Adult Mice
Source: Oxford University Press journal article supplement (doi:10.1158/0008-5472.can-14-1440), 2014-10-03
Supplement: 00085472can141440-sup-131681_1_supp_2647502_nbg7vh.xlsx [file 00085472can141440-sup-131681_1_supp_2647502_nbg7vh.xlsx]

## Sheet: JVA-Median-Centroid_Hm
Gene Symbol	Adult	Juvenile
ABCF1	0.096409	-0.153862
ABCF2	-0.0011225	0.03625
ACTA1	-0.00597	0.080599
ACTB	-0.676719	0.493929
ACTN4	0.192267	-0.110111
ADAMTS18	-0.586098	0.249116
ADAP1	-0.149181	0.599084
AGPS	-0.384288	0.3639
AGTR1	-0.454991	0.139197
ANAPC5	-0.025084	0.021131
ANO1	-0.400865	0.190643
APOB48R	0.731096	-0.48809
AREG	-1.56967	0.788214
ARL4C	0.590491	-0.25083
ATP6V0D1	0.233428	-0.236197
ATP9A	0.467996	-0.18172
AUP1	0.360261	-0.239423
BCL2L1	0.434601	-0.09385
BEX2	-0.245063	0.234169
C1QA	0.435985	-0.141581
C1QTNF3	0.210142	-0.150681
CALCA	0.0237095	0
CALR	1.31724	-0.384912
CALU	0.624571	-0.236386
CAPN6	-0.742027	0.231834
CBX3	0.229185	-0.428496
CCNL1	0.26947	-0.310438
CD200	-0.374285	0.419061
CD209	-0.162107	0.244725
CD74	0.521776	-0.320991
CDCA8	-0.284337	0.309682
CDO1	-0.559967	1.58482
CITED1	-0.0300375	0.354141
CLDN2	-0.113667	0.395226
CLDN6	-0.0207735	0.036615
CLK1	0.519451	-0.180155
COL6A1	0.507617	-0.458224
CORO1A	0.511284	-0.148516
CPE	1.23102	-0.8311
CRLF1	-0.630248	0.260428
CSF1R	0.520625	-0.341585
CSN3	-0.199252	0.51883
CSNK	-0.413905	0.5508
CTSA	0.287195	-0.466909
CUL4A	0.229835	-0.059536
CXCL12	-0.284068	0.663043
CXCL15	-0.212721	0.25388
CYB5R3	0.707147	-0.510538
DMRTA2	-0.326308	1.26548
DOK1	0.731991	-0.113326
DVL1	0.443273	-0.280133
EEF2	0.226096	-0.293803
EIF3B	0.674668	-0.003172
EIF4A2	0.278863	-0.242087
EIF4B	0.152049	-0.180805
EIF4G1	0.460938	-0.156431
EIF5A	0.04031	-0.276326
ELOVL1	0.00772	-0.201588
ENPP1	-0.650864	0.036678
ENSA	0.201255	-0.388447
ERGIC3	0.229286	-0.142232
ESRRB	-0.205103	0.297287
EXOC4	0.164102	-0.174023
FGFR2	-1.27481	1.37016
FOXA1	-1.4903	0.113066
FXR2	0.430634	-0.086601
FXYD6	-0.897629	0.097572
FZR1	0.479598	-0.255863
G0S2	-0.49371	0.107953
G3BP1	0.052146	-0.07162
GABRP	-0.131902	0.342494
GANAB	0.384281	-0.289364
GDI1	0.524891	-0.425922
GIPC2	-0.133799	0.70311
GMPPA	0.173717	-0.077254
GNA12	0.448841	-0.216602
GNA14	-0.417874	0.508034
GNAS	0.0890955	-0.113327
GUSB	0.304887	-0.291151
HBB	-0.474696	0.271362
HNRNPA2B1	0.578809	-0.377428
HNRNPH1	0.437926	-0.254971
HNRNPK	0.18177	0
HSPA8	0.242012	-0.154858
HSPD1	0.122338	-0.775658
IFI27	-0.456842	0.819049
IGF2	-0.532317	0.642342
IGFBP3	0.184319	-0.536287
IL33	-0.491725	0.422386
IRF1	0.408201	-0.362936
ITIH2	-0.084405	0.08957
IVNS1ABP	0.353355	-0.267488
KDELR2	0.24817	-0.090475
KRT18	-0.437939	0.296369
KRT19	-1.13633	0.808225
KRT7	-0.961031	0.598797
LCN2	-0.387909	0.131276
LGSN	0.5412	-0.196446
LHFP	0.259811	-0.605035
LRMP	0.182129	-0.169377
LTF	-1.19723	0.444907
LY6A	-0.260992	0.77326
LY6D	-0.509682	1.34139
MAEA	0.0645025	-0.114275
MAFG	0.302683	-0.284344
MAP1LC3A	0.264858	-0.340703
MAT2A	0.296857	-0.121544
MFSD11	0.327543	-0.33302
MLF2	0.570304	-0.3285
MMP13	1.43496	-0.957919
MMP3	0.915253	-0.170595
MSN	0.532319	-0.068392
MTCH1	0.30347	-0.296846
NTRK2	-0.374107	0.439949
P2RX4	0.173882	-0.553527
PABPC1	0.130862	-0.155083
PCSK6	0.029228	0
PFKP	0.346672	-0.382766
PHLDA2	-0.339896	0.446599
PHLDA3	0.170853	-0.319303
PLK2	-0.237371	0.269991
PODXL	-0.533666	0.717411
POLR2L	-0.430478	0.133763
PPFIBP1	0.376966	-0.194844
PPP1CA	0.218963	-0.124143
PPP2R1A	0.21341	-0.267481
PRLR	-0.579776	0.562574
PSMD7	0.443448	-0.051654
PTBP1	0.431522	-0.116849
PTN	-0.845364	1.76241
PXN	0.168692	-0.313061
RAB1B	0.185098	-0.039416
RAB34	0.358133	-0.305117
RALGDS	0.361439	-0.208999
RANBP3	0.32404	-0.135578
RARG	0.856596	-0.233078
RASGRF1	-0.0887455	0.051469
RBBP7	0.143239	-0.195308
RIMS3	-0.136092	0.374695
RNF114	0.257918	-0.138055
RNF4	0.010871	-0.086523
SIDT2	0.685871	-0.264564
SLC1A3	-0.654933	0.603201
SLC35F3	-0.091037	0.743737
SLC38A2	0.358604	-0.637584
SLC5A5	-0.261752	0.914068
SNRNP70	0.31956	-0.063839
SNRPA	0.030545	-0.165082
SORT1	-0.569191	0.44328
SPARC	0.253698	-0.40384
SPSB4	-0.370154	0.197069
SQLE	0.097318	-0.015733
SRM	0.371896	-0.249139
STAT3	0.250879	-0.400188
STC2	-0.650884	0.327344
STK39	-0.581398	0.356943
SYNGR2	0.245899	-0.30753
TCEA3	-1.17328	0.255421
TCF4	0.361202	-0.329903
TCIRG1	0.1682	-0.302346
TGOLN1	0.362494	-0.124672
TMED3	-0.245772	0.050335
TMEM214	0.258779	-0.293219
TMEM56	-0.24663	0.262158
TMEM66	0.163533	-0.36094
TMPRSS2	-0.534038	0.615008
TNFRSF1A	1.48782	-0.379817
TNN	0.399732	-0.161494
TP63	-2.65153	0.215329
TPM3	0.360986	-0.12091
TRPC4AP	0.306858	-0.336081
TSC22D4	0.950263	-0.415119
TSPAN3	0.234026	-0.22428
TSPO	0.204484	-0.413206
UBE2V1	0.71649	-0.046679
UNC93B1	0.651625	-0.155051
VAPB	0.356525	-0.041284
VARS	0.591677	-0.140628
WBP1	0.379248	-0.162205
WFDC12	-0.175815	0.47144
WFDC2	-0.428346	0.104831
WNT6	-0.856951	0.39767
YBX3	0.359401	-0.569631
